# Supplementary material for: Establishing risk of vision loss in Leber hereditary optic neuropathy
Source: PubMed Central journal article supplement (PMC8595929; doi:10.1016/j.ajhg.2021.09.015), 2021-10-19
Supplement: mmc1.pdf [file mmc1.pdf]

**The American Journal of Human Genetics, Volume 108**

**Supplemental information**

**Establishing risk of vision loss in**

**Leber hereditary optic neuropathy**

**M. Isabel G. Lopez Sanchez, Lisa S. Kearns, Sandra E. Staffieri, Linda Clarke, Myra B. McGuinness, Wafaa Meteoukki, Sona Samuel, Jonathan B. Ruddle, Celia Chen, Clare L. Fraser, John Harrison, Alex W. Hewitt, Neil Howell, and David A. Mackey**

## Supplemental Data

Figure S1. Confirmation of heteroplasmic mutation in individuals from LHON pedigrees NZ10, VIC02 and VIC30 by PCR and Sanger sequencing.

### NZ10 pedigree (m.14484T>C)

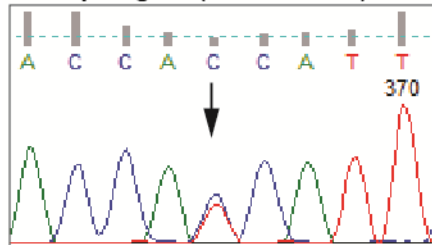

NZ10-1

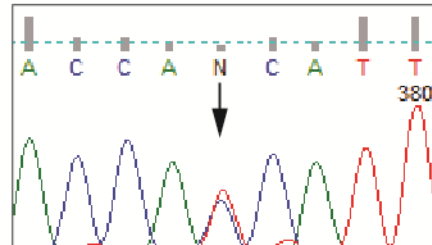

NZ10-2

### VIC02 pedigree (m.14484T>C)

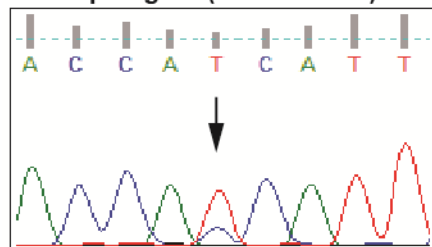

VIC2-3

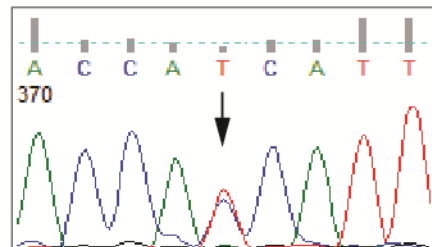

VIC2-5

### VIC30 pedigree (m.14484T>C)

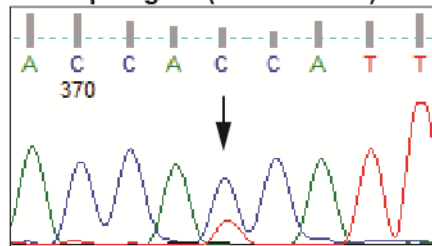

VIC30-2

**Table S1. Primer sequences of primers used for PCR**

| Primer       | Sequence                        |
|--------------|---------------------------------|
| 11778_Fwd    | CCC ACC TTG GCT ATC ATC         |
| 11778_Rev    | GGT AAG GCG AGG TTA GCG         |
| 14484_Fwd    | GCA TAA TTA AAC TTT ACT TC      |
| 14484_Rev    | AGA ATA TTG AGG CGC CAT TG      |
| 3460_Fwd     | TTC AAA TTC CTC CCT GTA CG      |
| 3460_Rev     | GGC TAC TGC TCG CAG TG          |
| DloopHV1_Fwd | TGG GGA AGC AGA TTT GGG TA      |
| DloopHV1_Rev | ACG TGT GGG CTA TTT AGG CT      |
| DloopHV2_Fwd | ATG GGC GGG GGT TGT ATT G       |
| DloopHV2_Rev | CAC AGG TCT ATC ACC CTA TTA ACC |

**Table S2. Complete mtDNA Sequences of LHON Pedigrees**

Sequences are presented as differences from the mtDNA revised Cambridge Reference Sequence (NC\_012920.1). Expansions or contractions of simple repeat sequences in the mitochondrial genome are not shown. In addition to the pedigree, we specify the pathogenic LHON mutation and the mtDNA haplogroup according to PhyloTree<sup>1</sup>.

| Pedigree (mutation)   | Haplogroup | mtDNA control region                                                                        | mtDNA coding region                                                                                                                                                                                                                                                                                          |
|-----------------------|------------|---------------------------------------------------------------------------------------------|--------------------------------------------------------------------------------------------------------------------------------------------------------------------------------------------------------------------------------------------------------------------------------------------------------------|
| NSW01<br>(m.11778G>A) | H1n        | 146 T:C; 263 A:G;<br>16468 T:C; 16519 T:C                                                   | 750 A:G; 1438 A:G; 2098 G:A; 3010 G:A; 4769 A:G; 8860 A:G; 14199 T:C; 15326 A:G; 15742 C:A; 15924 A:G                                                                                                                                                                                                        |
| NSW03<br>(m.11778G>A) | U5a1       | 73 A:G; 263 A:G;<br>16256 C:T; 16270 C:T;<br>16293 A:G; 16399 A:G                           | 750 A:G; 1438 A:G; 2706 A:G; 3197 T:C; 4769 A:G; 7028 C:T; 7792 C:T; 8860 A:G; 9477 G:A; 11467 A:G; 11719 G:A; 11914 G:A; 12308 A:G; 12372 G:A; 13617 T:C; 14766 C:T; 14793 A:G; 15218 A:G; 15317 G:A; 15326 A:G                                                                                             |
| NSW04<br>(m.11778G>A) | J1c1       | 73 A:G; 185 G:A; 228 G:A; 263 A:G; 295 C:T; 462 C:T; 482 T:C; 489 T:C; 16069 C:T; 16126 T:C | 750 A:G; 1438 A:G; 2706 A:G; 3010 G:A; 3394 T:C; 4216 T:C; 4769 A:G; 7028 C:T; 8020 G:A; 8860 A:G; 10398 A:G; 11251 A:G; 11287 T:C; 11719 G:A; 12612 A:G; 13708 G:A; 14766 C:T; 14798 T:C; 15326 A:G; 15452 C:A                                                                                              |
| NSW06<br>(m.11778G>A) | H4a1       | 263 A:G                                                                                     | 750 A:G; 1438 A:G; 3992 C:T; 4024 A:G; 4769 A:G; 5004 T:C; 8269 G:A; 8860 A:G; 9123 G:A; 10124 T:C; 14365 C:T; 14582 A:G; 14956 T:C; 15326 A:G                                                                                                                                                               |
| NSW09<br>(m.11778G>A) | J1c4       | 73 A:G; 185 G:A; 228 G:A; 263 A:G; 295 C:T; 462 C:T; 489 T:C; 16069 C:T; 16126 T:C          | 750 A:G; 1438 A:G; 2706 A:G; 3010 G:A; 4216 T:C; 4769 A:G; 7028 C:T; 7853 G:A; 8860 G:A; 9120 A:G; 9632 A:G; 9701 T:C; 10398 A:G; 11251 A:G; 11719 G:A; 12083 T:C; 12612 A:G; 13708 G:A; 14766 C:T; 14798 T:C; 15326 A:G; 15452 C:A                                                                          |
| NSW11<br>(m.11778G>A) | Y2a        | 73 A:G; 263 A:G; 482 T:C; 16126 T:C; 16231 T:C; 16305 A:G; 16311 T:C; 16362 T:C             | 750 A:G; 1438 A:G; 2706 A:G; 4769 A:G; 5147 G:A; 5417 G:A; 6941 T:C; 7028 C:T; 7632 T:C; 7859 G:A; 8392 G:A; 8860 A:G; 10398 A:G; 11299 T:C; 11719 G:A; 12161 T:C; 12705 C:T; 14178 T:C; 14693 A:G; 14766 C:T; 14914 A:G; 15244 A:G; 15326 A:G                                                               |
| NSW17<br>(m.11778G>A) | T2f1       | 73 A:G; 195 T:C; 263 A:G; 16126 T:C; 16189 T:C; 16294 C:T; 16296 C:T; 16298 T:C; 16519 T:C  | 709 G:A; 750 A:G; 1438 A:G; 1888 G:A; 2706 A:G; 4216 T:C; 4769 A:G; 4917 A:G; 5277 T:C; 5426 T:C; 6489 C:A; 7028 C:T; 8270 C:T; 8697 G:A; 8860 A:G; 10463 T:C; 11251 A:G; 11719 G:A; 11812 A:G; 13368 G:A; 14233 A:G; 14323 G:A; 14766 C:T; 14905 G:A; 15043 G:A; 15326 A:G; 15452 C:A; 15607 A:G; 15928 G:A |
| NSW18<br>(m.11778G>A) | J1c1       | 73 A:G; 263 A:G; 295 C:T; 462 C:T; 482 T:C; 489 T:C; 16069 C:T; 16126 T:C                   | 750 A:G; 1438 A:G; 2706 A:G; 3010 G:A; 3394 T:C; 4216 T:C; 4769 A:G; 7028 C:T; 8860 A:G; 10398 A:G; 11251 A:G; 11719 G:A; 12612 A:G; 13194 G:A;                                                                                                                                                              |

|                                    |        |                                                                                                                     |                                                                                                                                                                                                                                                                                             |
|------------------------------------|--------|---------------------------------------------------------------------------------------------------------------------|---------------------------------------------------------------------------------------------------------------------------------------------------------------------------------------------------------------------------------------------------------------------------------------------|
| NZ02<br>(m.11778G>A)               | U5b2a1 | 73 A:G; 150 C:T; 152 T:C; 263 A:G; 16189 T:C; 16325 T:C                                                             | 13708 G:A; 14766 C:T; 14798 T:C; 15326 A:G; 15452 C:A<br>750 A:G; 1438 A:G; 1721 C:T; 2706 A:G; 3197T:C; 4732 A:G; 4769 A:G; 6158 A:G; 7028 C:T; 7768 A:G; 8860 A:G; 9477 G:A; 11467 A:G; 11719 G:A; 12308 A:G; 12372 G:A; 13617 T:C; 13637 A:G; 14182 T:C; 14323 G:A; 14766 C:T; 15326 A:G |
| QLD02<br>(m.11778G>A)              | J2b1   | 73 A:G; 150 C:T; 152 T:C; 263 A:G; 295 C:T; 489 T:C; 16069 C:T; 16126 T:C; 16193 C:T                                | 750 A:G; 1438 A:G; 2706 A:G; 2789 C:T; 4216 T:C; 4769 A:G; 5633 C:T; 7028 C:T; 7476 C:T; 8860 A:G; 9872 A:G; 10172 G:A; 10398 A:G; 11251 A:G; 11719 G:A; 12612 A:G; 13708 G:A; 13821 C:T; 14766 C:T; 15257 G:A; 15326 A:G; 15452 C:A; 15812 G:A                                             |
| QLD03<br>(m.11778G>A)              | J1c2   | 73 A:G; 185 G:A; 188 A:G; 228 G:A; 263 A:G; 295 C:T; 462 C:T; 489 T:C; 16069 C:T; 16126T:C                          | 750 A:G; 1438 A:G; 2706 A:G; 3010 G:A; 4216 T:C; 4769 A:G; 6269 A:C; 7028 C:T; 8860 A:G; 10398 A:G; 11251 A:G; 11719 G:A; 12612 A:G; 13708 G:A; 14766 C:T; 14798 T:C; 15326 A:G; 15452 C:A                                                                                                  |
| QLD04<br>(m.11778G>A)              | T2b4   | 73 A:G; 263 A:G; 16126 T:C; 16294 C:T; 16304 T:C; 16519 T:C                                                         | 709 G:A; 750 A:G; 930 G:A; 1438 A:G; 1888 G:A; 2706 A:G; 4216 T:C; 4769 A:G; 4917 A:G; 7028 C:T; 8697 G:A; 8860 A:G; 9254 A:G; 10463 T:C; 11251 A:G; 11719 G:A; 11812 A:G; 13368 G:A; 14233 A:G; 14766 C:T; 14905 G:A; 15326 A:G; 15452 C:A; 15607 A:G; 15928 G:A                           |
| TAS01 <sup>a</sup><br>(m.11778G>A) | H      | 152 T:C; 263 A:G; 16093 T:C                                                                                         | 750 A:G; 1438 A:G; 4626 A:G; 4769 A:G; 8860 A:G; 11788 C:T; 15317 G:A; 15326 A:G                                                                                                                                                                                                            |
| TAS05<br>(m.11778G>A)              | H3f    | 93 A:G; 263 A:G; 16153 G:A; 16311 T:C; 16519 T:C                                                                    | 750 A:G; 1438 A:G; 4769 A:G; 6776 T:C; 8860 A:G; 12811 T:C; 15326 A:G                                                                                                                                                                                                                       |
| VIC04<br>(m.11778G>A)              | H1c3   | 195 T:C; 257 A:G; 263 A:G; 477 T:C; 16290 C:T; 16519 T:C                                                            | 750 A:G; 1438 A:G; 3010 G:A; 4769 A:G; 8473 T:C; 8860 A:G; 15326 A:G                                                                                                                                                                                                                        |
| VIC05<br>(m.11778G>A)              | K2a4   | 73 A:G; 146 T:C; 152 T:C; 263 A:G; 16129 G:A; 16224 T:C; 16311 T:C; 16519 T:C                                       | 709 G:A; 750 A:G; 1438 A:G; 1811 A:G; 2706 A:G; 3480 A:G; 4561 T:C; 4769 A:G; 7028 C:T; 8860 A:G; 9055 G:A; 9698 T:C; 9716 T:C; 10550 A:G; 11299 T:C; 11467 A:G; 11549 C:T; 11719 G:A; 12308 A:G; 12372 G:A; 14167 C:T; 14766 C:T; 14798 T:C; 15326 A:G                                     |
| VIC06<br>(m.11778G>A)              | H1     | 152 T:C; 263 A:G; 16189 T:C; 16239 C:T; 16519 T:C                                                                   | 750 A:G; 1438 A:G; 3010 G:A; 4769 A:G; 8860 A:G; 11596 A:G; 13230 C:T; 13768 T:C; 15326 A:G                                                                                                                                                                                                 |
| VIC07<br>(m.11778G>A)              | I2a    | 73 A:G; 152 T:C; 199 T:C; 204 T:C; 207 G:A; 250 T:C; 263 A:G; 16129 G:A; 16145 G:A; 16223 C:T; 16391 G:A; 16519 T:C | 750 A:G; 1438 A:G; 1719 G:A; 2706 A:G; 4529 A:T; 4769 A:G; 7028 C:T; 7813 C:T; 8251 G:A; 8860 A:G; 9266 G:A; 10034 T:C; 10238 T:C; 10398 A:G; 11065 A:G; 11719 G:A; 12501 G:A; 12705 C:T; 13780 A:G; 14766 C:T; 15043 G:A; 15326 A:G; 15758 A:G; 15924 A:G; 15937 A:G                       |
| VIC10<br>(m.11778G>A)              | J2a1a  | 73 A:G; 150 C:T; 152 T:C; 195 T:C 198 C:T; 222 C:T; 263 A:G; 295                                                    | 750 A:G; 1438 A:G; 1587 T:C; 2706 A:G; 4216 T:C; 4769 A:G; 7028 C:T; 7476 C:T; 7789 G:A; 8860 A:G; 10398                                                                                                                                                                                    |

|                       |        |                                                                                                                                                                                                                                    |                                                                                                                                                                                                                                                                                                                                                                                                                           |
|-----------------------|--------|------------------------------------------------------------------------------------------------------------------------------------------------------------------------------------------------------------------------------------|---------------------------------------------------------------------------------------------------------------------------------------------------------------------------------------------------------------------------------------------------------------------------------------------------------------------------------------------------------------------------------------------------------------------------|
| VIC17<br>(m.11778G>A) | J1c5a  | C:T; 319 T:C; 489 T:C;<br>513 G:A; 16069 C:T;<br>16126 T:C; 16145<br>G:A; 16189 T:C;<br>16231 T:C; 16261 C:T<br>73 A:G; 150 C:T; 185<br>G:A; 228 G:A; 263<br>A:G; 295 C:T; 462 C:T;<br>489 T:C; 16069 C:T;<br>16126 T:C; 16519 T:C | A:G; 10499 A:G; 11251 A:G; 11377 G:A;<br>11581 A:T; 11719 G:A; 12279 A:G <sup>c</sup> ;<br>12612 A:G; 13708 A:G; 13722 A:G;<br>14133 A:G; 14766 C:T; 15257 G:A;<br>15326 A:G; 15452 C:A<br>750 A:G; 1438 A:G; 2387 T:C; 2706<br>A:G; 3010 G:A; 4216 T:C; 4769 A:G;<br>5198 A:G; 7028 C:T; 8860 A:G; 10192<br>C:T; 10398 A:G; 11251 A:G; 11719 G:A;<br>12612 A:G; 13708 G:A; 14766 C:T;<br>14798 T:C; 15326 A:G; 15452 C:A |
| VIC18<br>(m.11778G>A) | U4c1   | 73 A:G; 195 T:C; 263<br>A:G; 489 T:C; 499<br>G:A; 16169 C:T;<br>16179 C:T; 16234 C:T;<br>16356 T:C; 16519 T:C                                                                                                                      | 750 A:G; 1438 A:G; 1811 A:G; 2706<br>A:G; 4646 T:C; 4769 A:G; 4811 A:G;<br>5999 T:C; 6047 A:G; 6146 A:G; 7028<br>C:T; 8860 A:G; 9070 T:G; 10907 T:C;<br>11009 T:C; 11332 C:T; 11467 A:G;<br>11719 G:A; 12308 A:G; 12372 G:A;<br>14620 C:T; 14766 C:T; 14866 C:T;<br>15326 A:G; 15693 T:C                                                                                                                                  |
| VIC19<br>(m.11778G>A) | B4b1a2 | 73 A:G; 207 G:A; 263<br>A:G; 499 G:A; 16136<br>T:C; 16153 G:A;<br>16189 T:C; 16217 T:C;<br>16235 A:G; 16519 T:C                                                                                                                    | 750 A:G; 827 A:G; 1438 A:G; 1664 G:A;<br>2706 A:G; 4769 A:G; 4820 G:A; 6023<br>G:A; 6216 T:C; 6413 T:C; 7028 C:T;<br>8860 A:G; 11719 G:A; 13590 G:A;<br>14766 C:T; 15326 A:G; 15535 C:T                                                                                                                                                                                                                                   |
| VIC21<br>(m.11778G>A) | H13a1a | 152 T:C; 263 A:G;<br>16311 T:C                                                                                                                                                                                                     | 750 A:G; 1438 A:G; 2259 A:G; 3591<br>G:T; 4745 A:G; 4769 A:G; 8860 A:G;<br>9233 T:C; 11410 T:C; 13680 C:T; 14872<br>C:T; 15326 A:G                                                                                                                                                                                                                                                                                        |
| VIC22<br>(m.11778G>A) | H13a1a | 263 A:G                                                                                                                                                                                                                            | 750 A:G; 1438 A:G; 2259 A:G; 4745<br>A:G; 4769 A:G; 8860 A:G; 13680 C:T;<br>14872 C:T; 15326 A:G; 15355 G:A                                                                                                                                                                                                                                                                                                               |
| VIC25<br>(m.11778G>A) | T1a1   | 73 A:G; 152 T:C; 195<br>T:C; 263 A:G; 16126<br>T:C; 16163 A:G;<br>16172 T:C; 16186 C:T;<br>16189 T:C; 16294 C:T;<br>16304 T:C; 16519 T:C                                                                                           | 709 G:A; 750 A:G; 1438 A:G; 1888 G:A;<br>2706 A:G; 4216 T:C; 4769 A:G; 4917<br>A:G; 7028 C:T; 7269 G:A; 8967 G:A;<br>8860 A:G; 9443 T:C; 9899 T:C; 10463<br>T:C; 10646 G:A; 11251 A:G; 11719 G:A;<br>12432 C:T; 12633 C:A; 13368 G:A;<br>14766 C:T; 14905 G:A; 15326 A:G;<br>15452 C:A; 15607 A:G; 15928 G:A                                                                                                              |
| VIC29<br>(m.11778G>A) | U5a1a1 | 73 A:G; 263 A:G;<br>16256 C:T; 16270 C:T;<br>16399 A:G                                                                                                                                                                             | 750 A:G; 1438 A:G; 1700 T:C; 2706<br>A:G; 3197 T:C; 4769 A:G; 5495 T:C;<br>6905 A:G; 7028 C:T; 8860 A:G; 9477<br>G:A; 11467 A:G; 11719 G:A; 12308 A:G;<br>12372 G:A; 13015 T:C; 13617 T:C;<br>14599 A:G; 14766 C:T; 14793 A:G;<br>15218 A:G; 15326 A:G; 15924 A:G                                                                                                                                                         |
| WAU03<br>(m.11778G>A) | l2a    | 73 A:G; 152 T:C; 199<br>T:C; 204 T:C; 207 G:A;<br>250 T:C; 263 A:G;<br>16126 T:C; 16145<br>G:A; 16223 C:T;<br>16391 G:A; 16519 T:C                                                                                                 | 750 A:G; 1438 A:G; 1719 G:A; 2706<br>A:G; 3398 T:C; 4529 A:T; 4769 A:G;<br>7028 C:T; 8251 G:A; 8860 A:G; 10034<br>T:C; 10238 T:C; 10398 A:G; 11065 A:G;<br>11719 G:A; 12501 G:A; 12705 C:T;<br>13780 A:G; 14766 C:T; 15043 G:A;<br>15326 A:G; 15758 A:G; 15924 A:G                                                                                                                                                        |
| WAU04<br>(m.11778G>A) | H3     | 263 A:G; 16189 T:C;<br>16519 T:C                                                                                                                                                                                                   | 750 A:G; 1438 A:G; 4769 A:G; 5087<br>T:C; 6776 T:C; 8860 A:G; 10325 G:A;<br>15326 A:G                                                                                                                                                                                                                                                                                                                                     |
| NSW12<br>(m.14484T>C) | K1c2   | 73 A:G; 146 T:C; 152<br>T:C; 263 A:G; 16224<br>T:C; 16311 T:C; 16320                                                                                                                                                               | 750 A:G; 1189 T:C; 1438 A:G; 1811<br>A:G; 2706 A:G; 3480 A:G; 4769 A:G;<br>7028 C:T; 8860 A:G; 9006 A:G; 9055<br>G:A; 9698 T:C; 10398 A:G; 10550 A:G;                                                                                                                                                                                                                                                                     |

|                                    |        |                                                                                                                                                                                                                    |                                                                                                                                                                                                                                                                                                                                                                                                                                                                                                                                                                                                                  |
|------------------------------------|--------|--------------------------------------------------------------------------------------------------------------------------------------------------------------------------------------------------------------------|------------------------------------------------------------------------------------------------------------------------------------------------------------------------------------------------------------------------------------------------------------------------------------------------------------------------------------------------------------------------------------------------------------------------------------------------------------------------------------------------------------------------------------------------------------------------------------------------------------------|
|                                    |        | C:T; 16356 T:C; 16519 T:C                                                                                                                                                                                          | 11299 T:C; 11467 A:G; 11719 G:A; 12308 A:G; 12372 G:A; 14002 A:G; 14040 G:A; 14167 C:T; 14766 C:T; 14798 T:C; 15326 A:G                                                                                                                                                                                                                                                                                                                                                                                                                                                                                          |
| NSW15<br>(m.14484T>C)              | U5a1a1 | 73 A:G; 263 A:G; 16256 C:T; 16270 C:T; 16399 A:G                                                                                                                                                                   | 750 A:G; 979 C:T; 1438 A:G; 1700 T:C; 2706 A:G; 3197 T:C; 4769 A:G; 5495 T:C; 6164 C:T; 7028 C:T; 8860 A:G; 9477 G:A; 11467 A:G; 11719 G:A; 12308 A:G; 12372 G:A; 13617 T:C; 14766 C:T; 14793 A:G; 15218 A:G; 15326 A:G; 15924 A:G                                                                                                                                                                                                                                                                                                                                                                               |
| NSW19<br>(m.14484T>C)              | L1b1a1 | 73 A:G; 152 T:C; 182 C:T; 185 G:T; 195 T:C; 247 G:A; 263 A:G; 264 C:T; 357 A:G; 16114 C:T; 16126 T:C; 16187 C:T; 16189 T:C; 16215 A:C; 16223 C:T; 16264 C:T; 16270 C:T; 16278 C:T; 16293 A:G; 16311 T:C; 16519 T:C | 709 G:A; 710 T:C; 750 A:G; 769 G:A; 825 T:A; 1018 G:A; 1738 T:C; 2352 T:C; 2706 A:G; 2758 G:A; 2768 A:G; 2885 T:C; 3308 T:C; 3396 T:C; 3594 C:T; 3666 G:A; 3693 G:A; 4104 A:G; 4769 A:G; 5036 A:G; 5046 G:A; 5393 T:C; 5655 T:C; 6548 C:T; 6827 T:C; 6989 A:G; 7028 C:T; 7055 A:G; 7146 A:G; 7256 C:T; 7389 T:C; 7521 G:A; 7867 C:T; 8248 A:G; 8468 C:T; 8655 C:T; 8701 A:G; 8860 A:G; 9540 T:C; 10398 A:G; 10688 G:A; 10810 T:C; 10873 T:C; 11719 G:A; 12519 T:C; 12705 C:T; 13105 A:G; 13506 C:T; 13650 C:T; 13789 T:C; 13880 C:A; 14178 T:C; 14203 A:G; 14560 G:A; 14766 C:T; 14769 A:G; 15115 T:C; 15326 A:G |
| TAS02<br>(m.14484T>C)              | J1c2c  | 73 A:G; 146 T:C; 185 G:A; 188 A:G; 222 C:T; 228 G:A; 263 A:G; 295 C:T; 462 C:T; 489 T:C; 16069 C:T; 16126 T:C; 16261 C:T; 16519 T:C                                                                                | 750 A:G; 1438 A:G; 2706 A:G; 3010 G:A; 4216 T:C; 4769 A:G; 7028 C:T; 8610 T:C; 8860 A:G; 10398 A:G; 10685 G:A; 11251 A:G; 11719 A:G; 12612 A:G; 13281 T:C; 13708 G:A; 13933 A:G; 14766 C:T; 14798 T:C; 15326 A:G; 15452 C:A                                                                                                                                                                                                                                                                                                                                                                                      |
| VIC02 <sup>b</sup><br>(m.14484T>C) | J1b1a  | 73 A:G; 185 G:A; 242 C:T; 263 A:G; 295 C:T; 462 C:T; 489 T:C; 16069 C:T; 16126 T:C; 16145 G:A; 16172 T:C; 16222 C:T; 16261 C:T                                                                                     | 750 A:G; 1438 A:G; 1462 G:A; 2158 A:G; 2706 A:G; 3010 G:A; 4216T:C; 4659 G:A; 4769 A:G; 5460 C:T; 6345 T:C; 7028 G:A; 7299 A:G; 8269 G:A; 8557 G:A; 8860 A:G; 10398 A:G; 11251 A:G; 11719 A:G; 12007 G:A; 12612 A:G; 13708 G:A; 13879 T:C; 14766 C:T; 15326 T:C; 15452 C:A                                                                                                                                                                                                                                                                                                                                       |
| VIC08<br>(m.14484T>C)              | J1c1   | 73 A:G; 152 T:C; 263 A:G; 295 C:T; 462 C:T; 489 T:C; 16069 C:T; 16126 T:C; 16193 C:T; 16519 T:C                                                                                                                    | 750 A:G; 1438 A:G; 2706 A:G; 3010 G:A; 4216 T:C; 4769 A:G; 7028 C:T; 7789 G:A; 7963 A:G; 8779 C:T; 8860 A:G; 9041 A:G; 10398 A:G; 11251 A:G; 11719 G:A; 12612 A:G; 12681 T:C; 13708 G:A; 14766 C:T; 15326 A:G; 15452 C:A                                                                                                                                                                                                                                                                                                                                                                                         |
| VIC11<br>(m.14484T>C)              | J1c1   | 73 A:G; 185 G:A; 189 A:G; 228 G:A; 263 A:G; 295 C:T; 462 C:T; 489 T:C; 16069 C:T; 16126 T:C; 16293 A:G                                                                                                             | 750 A:G; 1438 A:G; 2706 A:G; 3010 G:A; 3394 T:C; 4216 T:C; 4769 A:G; 7028 C:T; 8860 A:G; 10398 A:G; 11251 A:G; 11719 G:A; 12612 A:G; 13708 G:A; 14766 C:T; 14798 T:C; 15184 T:C; 15326 A:G; 15452 C:A                                                                                                                                                                                                                                                                                                                                                                                                            |
| VIC14<br>(m.14484T>C)              | H3c    | 195 T:C; 263 A:G; 16176 C:T                                                                                                                                                                                        | 750 A:G; 1211 G:A; 1438 A:G; 4769 A:G; 6261 G:A; 6776 T:C; 7444 G:A; 8347 A:G; 8860 A:G; 12957 T:C; 14305 G:A; 15326 A:G                                                                                                                                                                                                                                                                                                                                                                                                                                                                                         |

|                                      |        |                                                                                                                                      |                                                                                                                                                                                                                                                                                                                                                 |
|--------------------------------------|--------|--------------------------------------------------------------------------------------------------------------------------------------|-------------------------------------------------------------------------------------------------------------------------------------------------------------------------------------------------------------------------------------------------------------------------------------------------------------------------------------------------|
| TAS03<br>(m.3460G>A)                 | H5a1   | 263 A:G; 456 C:T;<br>16304 T:C                                                                                                       | 750 A:G; 1438 A:G; 4336 T:C; 4769<br>A:G; 8860 A:G; 12696 T:C; 15326 A:G;<br>15833 C:T                                                                                                                                                                                                                                                          |
| VIC01<br>(m.3460G>A)                 | H      | 93 A:G; 207 G:A; 263<br>A:G; 16519 T:C                                                                                               | 750 A:G; 1438 A:G; 4769 A:G; 8860<br>A:G; 9612 G:A; 11560 A:G; 15058 C:T;<br>15326 A:G                                                                                                                                                                                                                                                          |
| WAU06<br>(m.3460G>A)                 | M53    | 73 A:G; 240 A:G; 263<br>A:G; 390 A:T; 438 C:T;<br>489 T:C; 16051 A:G;<br>16093 T:C; 16223 C:T;<br>16316 A:G; 16400<br>C:T; 16519 T:C | 593 T:C; 750 A:G; 2010 T:C; 2706 A:G;<br>4769 A:G; 5493 T:C; 5821 G:A; 6216<br>T:C; 6719 T:C; 7028 C:T; 7805 G:A;<br>8701 A:G; 8860 A:G; 9302 C:T; 9540<br>T:C; 10084 T:C; 10398 A:G; 10400 C:T;<br>10873 T:C; 11167 A:G; 11560 A:G;<br>11719 G:A; 12630 G:A; 12705 C:T;<br>14766 C:T; 14783 T:C; 15043 G:A;<br>15301 G:A; 15315 C:T; 15326 A:G |
| NSW08<br>(m.14482C>G)                | I1a    | 73 A:G; 199 T:C; 204<br>T:C; 250 T:C; 263 A:G;<br>16129 G:A; 16172<br>T:C; 16223 C:T; 16311<br>T:C; 16391 G:A;<br>16519 T:C          | 750 A:G; 1438 A:G; 1531 C:T; 1719<br>G:A; 2706 A:G; 3447 A:G; 4529 A:T;<br>4769 A:G; 6734 G:A; 7028 C:T; 8248<br>A:G; 8251 G:A; 8616 G:T; 8860 A:G;<br>9966 G:A; 10034 T:C; 10238 T:C; 10398<br>A:G; 10550 A:G; 11719 G:A; 12501 G:A;<br>12705 C:T; 12864 T:C; 13780 A:G;<br>14766 C:T; 15043 G:A; 15326 A:G;<br>15589 C:T                      |
| VIC20<br>(m.11778G>A/<br>m.14484T>C) | U5a1a1 | 73 A:G; 152 T:C; 263<br>A:G; 16231 T:C;<br>16256 C:T; 16270 C:T;<br>16399 A:G                                                        | 750 A:G; 1438 A:G; 1700 T:C; 2706<br>A:G; 3197 T:C; 4769 A:G; 5495 T:C;<br>7028 C:T; 8860 A:G; 9477 G:A; 11467<br>A:G; 11719 G:A; 12308 A:G; 12372 G:A;<br>12771 G:A; 13617 T:C; 14766 C:T;<br>14793 A:G; 15218 A:G; 15326 A:G;<br>15924 A:G                                                                                                    |
| QLD01<br>(m.14484T>C/<br>m.4160T>C)  | U4a1a  | 73 A:G; 152 T:C; 263<br>A:G; 499 G:A; 16134<br>C:T; 16356 T:C; 16519<br>T:C                                                          | 750 A:G; 961 T:C; 1438 A:G; 1811 A:G;<br>2706 A:G; 4646 T:C; 4769 A:G; 5999<br>T:C; 6047 A:G; 6845 C:T; 7028 C:T;<br>8818 C:T; 8860 A:G; 11332 C:T; 11467<br>A:G; 11719 G:A; 12308 A:G; 12372 G:A;<br>12937 A:G; 14620 C:T; 14766 C:T;<br>15326 A:G; 15693 T:C                                                                                  |

<sup>a</sup> Nine members of the TAS01 pedigree were used for sequencing; five of them were sequenced in triplicate. Within the limits of MitoChip-based sequencing, all sequences matched those obtained previously by both manual and automated sequencing procedures.

<sup>b</sup> Sequence change is heteroplasmic in the sample analyzed.



**Table S3. Partial mtDNA Sequences of LHON Pedigrees.**

Sequences are presented as differences from the mtDNA revised Cambridge Reference Sequence (NC\_012920.1). Expansions or contractions of simple repeat sequences in the mitochondrial genome are not shown. In addition to the pedigree, we specify the pathogenic LHON mutation and the mtDNA haplogroup according to MitoMaster<sup>2</sup>.

| Pedigree (mutation)   | Haplogroup | mtDNA control region                                                                                                                                          | mtDNA coding region                                                                                                            |
|-----------------------|------------|---------------------------------------------------------------------------------------------------------------------------------------------------------------|--------------------------------------------------------------------------------------------------------------------------------|
| NSW02<br>(m.11778G>A) | H          | 152 T:C; 263 A:G; 16189 T:C;<br>16239 C:T; 16519 T:C                                                                                                          | 4769 A:G; 13768 T:C                                                                                                            |
| NSW23<br>(m.11778G>A) | J          | 73 A:G; 150 C:T; 152 T:C; 195<br>T:C; 215 A:G; 263 A:G; 295<br>C:T; 319 T:C; 489 T:C; 513<br>G:A; 16069 C:T; 16126 T:C;<br>16145 G:A; 16231 T:C; 16261<br>C:T | 3447 A:G; 4216 T:C; 4769 A:G;<br>7419 G:A; 7476 C:T; 11251<br>A:G; 11719 G:A; 12612 A:G;<br>13708 G:A; 13722 A:G; 15257<br>G:A |
| NSW26<br>(m.11778G>A) | K          | 73 A:G; 146 T:C; 152 T:C; 263<br>A:G; 16224 T:C; 16259 C:T;<br>16311 T:C; 16320 C:T; 16519<br>T:C                                                             | 3480 A:G; 11299 T:C; 11467<br>A:G; 11719 G:A                                                                                   |
| NZ01<br>(m.11778G>A)  | U          | 73 A:G; 152 T:C; 217 T:C; 263<br>A:G; 508 A:G; 16051 A:G;<br>16092 T:C; 16129 G:C; 16189<br>T:C; 16362 T:C; 16519 T:C                                         | 11719 G:A                                                                                                                      |
| NZ03<br>(m.11778G>A)  | J          | 73 A:G; 185 G:A; 188 A:G; 228<br>G:A; 263 A:G; 295 C:T; 462<br>C:T; 489 T:C; 16069 C:T;<br>16126 T:C; 16325 T:C; 16519<br>T:C                                 | 4216 T:C; 4769 A:G; 11719<br>G:A; 11911 T:C; 12612 A:G;<br>13708 G:A; 14798 T:C                                                |
| NZ12<br>(m.11778G>A)  | H          | 74 T:A; 263 A:G; 315 C:CC;<br>16337 C:A; 16519 T:C                                                                                                            |                                                                                                                                |
| QLD05<br>(m.11778G>A) | HV         | 263 A:G; 16111 C:T; 16519<br>T:C                                                                                                                              |                                                                                                                                |
| QLD10<br>(m.11778G>A) | N          | 73 A:G; 204 T:C; 263 A:G;<br>16223 C:T                                                                                                                        |                                                                                                                                |
| QLD11<br>(m.11778G>A) | W          | 73 A:G; 195 T:C; 204 T:C; 207<br>G:A; 263 A:G; 16223 C:T;<br>16292 C:T                                                                                        | 3505 A:G; 11719 G:A                                                                                                            |
| QLD12<br>(m.11778G>A) | U          | 195 T:C; 263 A:G; 16192 C:T;<br>16256 C:T; 16270 C:T; 16320<br>C:T; 16399 A:G                                                                                 | 11467 A:G                                                                                                                      |
| VIC03<br>(m.11778G>A) | U          | 16192 C:T; 16249 T:C; 16270<br>C:T; 16311 T:C; 16411 C:G;<br>16412 G:T                                                                                        | 11440 G:A; 11467 A:G; 11719<br>G:A                                                                                             |
| VIC31<br>(m.11778G>A) | J          | 16069 C:T; 16126 T:C; 16311<br>T:C; 16411 C:G; 16412 G:T                                                                                                      |                                                                                                                                |
| VIC41<br>(m.11778G>A) | H          | 152 T:C; 263 A:G; 16093 T:C                                                                                                                                   | 11719 G:A                                                                                                                      |
| VIC43<br>(m.11778G>A) | K          | 73 A:G; 114 C:T; 263 A:G; 315<br>C:CC; 16224 T:C; 16234 C:T;<br>16311 T:C                                                                                     | 11299 T:C; 11467 A:G; 11470<br>A:G; 11719 G:A                                                                                  |
| WAU01<br>(m.11778G>A) | J          | 73 A:G; 228 G:A; 263 A:G; 295<br>C:T; 462 C:T; 482 T:C; 489<br>T:C; 16069 C:T                                                                                 | 3394 T:C; 4216 T:C; 4769 A:G;<br>11251 A:G; 11719 G:A; 12612<br>A:G; 13708 G:A; 13899 T:C;<br>14798 T:C                        |

|                                    |     |                                                                                                        |                                                                                                           |
|------------------------------------|-----|--------------------------------------------------------------------------------------------------------|-----------------------------------------------------------------------------------------------------------|
| WAU02<br>(m.11778G>A)              | K   | 73 A:G; 150 C:T; 263 A:G; 315 C:CC; 16224 T:C; 16311 T:C; 16519 T:C                                    | T11299C, A11467G, T11485C, G11719A, C11840T                                                               |
| ACT01<br>(m.14484T>C)              | J   | 73 A:G; 185 G:A; 228 G:A; 263 A:G; 295 C:T; 462 C:T; 482 T:C; 489 T:C; 16069 C:T; 16126 T:C; 16213 T:C | 3394 T:C; 4216 T:C; 4769 A:G; 9682 T:C; 11251 A:G; 11719 G:A; 12612 A:G; 13708 G:A                        |
| NZ10 <sup>a</sup><br>(m.14484T>C)  | J   | 150 C:T; 152 T:C; 195 T:C; 215 A:G; 295 C:T; 319 T:C; 16126 T:C; 16145 G:A; 16231 T:C; 16261 C:T       | 11251 A:G; 11377 G:A                                                                                      |
| NZ11<br>(m.14484T>C)               | J   | 150 C:T; 185 G:A; 228 G:A; 295 C:T; 462 C:T; 16126 T:C; 16311 T:C                                      |                                                                                                           |
| SAU05<br>(m.14484T>C)              | H   | 195 T:C; 263 A:G; 310T:C; 366 G:A; 16448 T:C                                                           | 11719 G:A                                                                                                 |
| VIC30 <sup>a</sup><br>(m.14484T>C) | H   | 153 A:G; 195 T:C; 263 A:G                                                                              | 14299 T:A; 14487 T:G; 14488 T:G                                                                           |
| VIC42<br>(m.14484T>C)              | J   | 73 A:G; 185 G:A; 228 G:A; 263 A:G 295 C:T; 309 C:CCT; 310 T:C; 462 C:T; 482 T:C; 16126 T:C; 16213 G:A  | 14484 T:C; 14766 C:T; 14798 T:C                                                                           |
| NSW07<br>(m.3460G>A)               | T   | 73 A:G; 263 A:G; 331 A:G; 16126 T:C; 16234 T:C; 16294 C:T; 16296 C:T; 16519 T:C                        | 4216 T:C; 4769 A:G; 4917 A:G; 11251 A:G; 11719 G:A; 11812 A:G; 13965 T:C; 13966 A:G; 14687 A:G; 15928 G:A |
| VIC28<br>(m.3460G>A)               | H   | 114 C:T; 146 T:C; 195 T:C; 16288 T:C; 16302 A:G; 16362 T:C                                             |                                                                                                           |
| SAU04<br>(m.4171C>A)               | HV0 | 72 T:C; 263 A:G; 195 T:C; 16497 A:G                                                                    |                                                                                                           |

---

<sup>a</sup> Sequence change is heteroplasmic in the sample analysed.

**Table S4. Updated Assignments of Australian LHON Matrilineal Pedigrees**

| Previous Assignment | Updated Assignment     | Reference                       |
|---------------------|------------------------|---------------------------------|
| NSW13 (m.14484T>C)  | NSW19 <sup>a</sup>     |                                 |
| NSW21(m.11778G>A)   | VIC29 <sup>a, b</sup>  |                                 |
| QLD08 (m.14484T>C)  | TAS02 <sup>b</sup>     |                                 |
| SAU01 (m.11778G>A)  | NSW23 <sup>b</sup>     | Chan <i>et al.</i> <sup>3</sup> |
| TAS04               | None OPA1 <sup>c</sup> | Mackey and Buttery <sup>4</sup> |
| VIC12               | None <sup>d</sup>      |                                 |
| VIC13 (m.11778G>A)  | VIC04 <sup>b</sup>     |                                 |
| VIC16 (m.11778G>A)  | TAS01 <sup>a, b</sup>  |                                 |
| VIC23 (m.11778G>A)  | TAS01 <sup>a, b</sup>  |                                 |
| VIC26 (m.11778G>A)  | TAS01 <sup>a, b</sup>  |                                 |
| VIC27 (m.11778G>A)  | TAS01 <sup>b</sup>     |                                 |
| VIC44 (m.14484T>C)  | TAS02 <sup>b</sup>     |                                 |

<sup>a</sup> Reassignment was made on the basis of mtDNA sequence analysis.  
<sup>b</sup> Confirmed or determined by further genealogical analysis.  
<sup>c</sup> Updated diagnosis of autosomal dominant optic atrophy  
<sup>d</sup> Determination of the complete mtDNA sequence from one family member failed to reveal a LHON mutation. As a result, no assignment is made pending further investigation.

**Table S5. mtDNA haplogroup distribution amongst asymptomatic and affected individuals**

| mtDNA Haplotype | Mutation, number (%) |                 |               |                |              |                 |              | Total           |
|-----------------|----------------------|-----------------|---------------|----------------|--------------|-----------------|--------------|-----------------|
|                 | 11778                | 14484           | 3460          | 14484/<br>4160 | 14482        | 14484/<br>11778 | 4171         |                 |
|                 | n=3,986              | n=1,215         | n=176         | n=84           | n=54         | n=41            | n=12         | n=5,568         |
| H               | 2,699<br>(67.7)      | 98 (8.1)        | 128<br>(72.7) |                |              |                 | 12<br>(100)  | 2,937<br>(52.7) |
| J               | 495<br>(12.4)        | 934<br>(76.9)   |               |                |              |                 |              | 1,429<br>(25.7) |
| U               | 241 (6.0)            | 26 (2.1)        |               | 84<br>(100)    |              | 41<br>(100)     |              | 392 (7.0)       |
| I               | 126 (3.2)            |                 |               |                | 54<br>(100)  |                 |              | 180 (3.2)       |
| K               | 97 (2.4)             | 67 (5.5)        |               |                |              |                 |              | 164 (2.9)       |
| L               |                      | 54 (4.4)        |               |                |              |                 |              | 54 (1.0)        |
| T               | 29 (0.7)             |                 | 10 (5.7)      |                |              |                 |              | 39 (0.7)        |
| B               | 23 (0.6)             |                 |               |                |              |                 |              | 23 (0.4)        |
| M               |                      |                 | 16 (9.1)      |                |              |                 |              | 16 (0.3)        |
| N               | 16 (0.4)             |                 |               |                |              |                 |              | 16 (0.3)        |
| Y               | 14 (0.4)             |                 |               |                |              |                 |              | 14 (0.3)        |
| W               | 7 (0.2)              |                 |               |                |              |                 |              | 7 (0.1)         |
| Unknown         | 239 (6.0)            | 36 (3.0)        | 22<br>(12.5)  |                |              |                 |              | 297 (5.3)       |
| Vision loss     |                      |                 |               |                |              |                 |              |                 |
| Carrier         | 3,586<br>(90.0)      | 1,089<br>(89.6) | 155<br>(88.1) | 23<br>(27.4)   | 47<br>(87.0) | 38<br>(92.7)    | 10<br>(83.3) | 4,948<br>(88.9) |
| Affected        | 400<br>(10.0)        | 126<br>(10.4)   | 21<br>(11.9)  | 61<br>(72.6)   | 7<br>(13.0)  | 3 (7.3)         | 2<br>(16.7)  | 620<br>(11.1)   |

**Table S6. Vision loss in offspring of affected women**

|    | Pedigree_Mother ID | Individuals with vision loss/ Total offspring over 25 years old; [penetrance] |        |
|----|--------------------|-------------------------------------------------------------------------------|--------|
|    | m.11778G>A         | Male                                                                          | Female |
| 1  | ACT02_210411       | 0/1                                                                           | 0/1    |
| 2  | ACT02_210414       | 1/1                                                                           | 0/0    |
| 3  | NSW01_177394       | 0/0                                                                           | 0/2    |
| 4  | NSW02_173447       | 0/0                                                                           | 0/2    |
| 5  | NSW03_107116       | 0/1                                                                           | 1/2    |
| 6  | NSW03_107118       | 0/0                                                                           | 0/2    |
| 7  | NSW04_177055       | 1/2                                                                           | 1/1    |
| 8  | NSW04_177163       | 0/1                                                                           | 0/1    |
| 9  | NSW04_177157       | 1/2                                                                           | 0/0    |
| 10 | NSW04_177052       | 1/3                                                                           | 0/0    |
| 11 | NSW04_177060       | 2/2                                                                           | 0/1    |
| 12 | NSW04_177117       | 0/1                                                                           | 0/2    |
| 13 | NSW04_210438       | 2/4                                                                           | 0/6    |
| 14 | NSW05_177864       | 1/3                                                                           | 0/1    |
| 15 | NSW06_177316       | 0/2                                                                           | 0/1    |
| 16 | NSW06_177330       | 0/0                                                                           | 0/1    |
| 17 | NSW06_177338       | 0/1                                                                           | 0/1    |
| 18 | NSW09_107204       | 0/3                                                                           | 1/2    |
| 19 | NSW09_107215       | 1/3                                                                           | 0/2    |
| 20 | NSW09_107201       | 1/4                                                                           | 0/2    |
| 21 | NSW09_107232       | 0/1                                                                           | 0/0    |
| 22 | NSW09_107254       | 1/1                                                                           | 0/0    |
| 23 | NSW11_177475       | 1/2                                                                           | 0/1    |
| 24 | NSW20_107993       | 2/2                                                                           | 1/1    |
| 25 | NSW20_107997       | 1/1                                                                           | 0/0    |
| 26 | NZ02_178125        | 1/2                                                                           | 0/0    |
| 27 | NZ02_178126        | 1/2                                                                           | 0/1    |
| 28 | QLD02_108797       | 0/0                                                                           | 0/1    |
| 29 | QLD02_108510       | 0/2                                                                           | 0/7    |
| 30 | VIC21_108837       | 0/1                                                                           | 0/3    |
| 31 | VIC21_107370       | 0/3                                                                           | 0/2    |
| 32 | QLD12_197430       | 0/0                                                                           | 0/1    |
| 33 | TAS01_105409       | 1/1                                                                           | 1/1    |
| 34 | TAS01_104842       | 0/2                                                                           | 0/0    |
| 35 | TAS01_105041       | 1/1                                                                           | 0/4    |
| 36 | TAS01_105245       | 0/1                                                                           | 2/2    |
| 37 | TAS01_104467       | 1/3                                                                           | 0/7    |
| 38 | TAS01_105011       | 2/2                                                                           | 0/2    |
| 39 | TAS01_105194       | 0/2                                                                           | 0/1    |
| 40 | TAS01_105223       | 0/2                                                                           | 0/2    |
| 41 | TAS01_105255       | 0/0                                                                           | 0/3    |
| 42 | TAS01_174915       | 3/3                                                                           | 0/1    |
| 43 | TAS01_174813       | 0/0                                                                           | 0/2    |
| 44 | TAS01_174490       | 0/0                                                                           | 0/2    |
| 45 | TAS01_174090       | 0/1                                                                           | 0/1    |
| 46 | TAS01_174449       | 1/3                                                                           | 0/4    |
| 47 | TAS01_174824       | 0/2                                                                           | 0/0    |
| 48 | VIC06_109398       | 1/4                                                                           | 1/5    |
| 49 | VIC06_109401       | 0/1                                                                           | 0/1    |
| 50 | VIC10_156049       | 0/1                                                                           | 0/0    |
| 51 | VIC40_178503       | 1/2                                                                           | 0/1    |
| 52 | WA01_107453        | 1/2                                                                           | 0/0    |
| 53 | WA01_107435        | 0/0                                                                           | 1/1    |

|                        |              |         |         |
|------------------------|--------------|---------|---------|
| 54                     | WA01_107426  | 0/0     | 1/3     |
| 55                     | WA02_195793  | 0/2     | 0/0     |
| 56                     | WA04_109455  | 0/1     | 0/1     |
| <hr/>                  |              |         |         |
| m.14484T>C             |              |         |         |
| 57                     | NSW19_107852 | 0/2     | 0/1     |
| 58                     | SA02_178275  | 1/2     | 0/0     |
| 59                     | TAS02_175792 | 0/0     | 0/3     |
| 60                     | TAS02_175621 | 0/1     | 0/0     |
| 61                     | TAS02_175743 | 0/1     | 0/2     |
| 62                     | TAS02_175324 | 0/0     | 0/2     |
| 63                     | TAS02_172941 | 1/2     | 0/1     |
| 64                     | TAS02_206147 | 0/0     | 0/1     |
| 65                     | TAS02_173057 | 0/6     | 0/3     |
| 66                     | VIC02_109179 | 0/0     | 3/3     |
| 67                     | VIC02_109183 | 0/1     | 0/0     |
| 68                     | VIC11_109070 | 0/1     | 0/2     |
| 69                     | VIC11_109069 | 0/0     | 1/2     |
| 70                     | VIC11_108996 | 1/3     | 1/1     |
| <hr/>                  |              |         |         |
| m.3460G>A              |              |         |         |
| 71                     | VIC01_108975 | 0/0     | 1/2     |
| 72                     | NSW07_171660 | 0/1     | 0/1     |
| <hr/>                  |              |         |         |
| m.14484T>C + m.4160T>C |              |         |         |
| 73                     | QLD01_108448 | 0/0     | 1/1     |
| 74                     | QLD01_108424 | 2/2     | 1/2     |
| 75                     | QLD01_108446 | 2/2     | 1/1     |
| 76                     | QLD01_108491 | 1/3     | 1/1     |
| 77                     | QLD01_108444 | 0/3     | 0/1     |
| 78                     | QLD01_108437 | 1/1     | 1/1     |
| 79                     | QLD01_108463 | 1/1     | 2/2     |
| 80                     | QLD01_108495 | 0/0     | 1/1     |
| 81                     | QLD01_108474 | 1/1     | 0/0     |
| 82                     | QLD01_108469 | 1/1     | 4/4     |
| 83                     | QLD01_108473 | 0/0     | 2/2     |
| 84                     | QLD01_108421 | 0/1     | 1/1     |
| 85                     | QLD01_108439 | 1/1     | 0/0     |
| 86                     | QLD01_108412 | 3/4     | 4/6     |
| 87                     | QLD01_108441 | 0/0     | 2/2     |
| 88                     | QLD01_108451 | 0/0     | 1/1     |
| 89                     | QLD01_108454 | 0/0     | 1/1     |
| 90                     | QLD01_108456 | 1/3     | 0/0     |
| 91                     | QLD01_108466 | 1/1     | 2/2     |
| 92                     | QLD01_108488 | 0/0     | 1/1     |
| 93                     | QLD01_108493 | 0/0     | 1/2     |
| <hr/>                  |              |         |         |
| m.14482C>G             |              |         |         |
| 94                     | NSW08_108088 | 1/1     | 1/2     |
| <hr/>                  |              |         |         |
| Total                  |              | 49/132  | 44/149  |
|                        |              | [37.1%] | [29.5%] |
| <hr/>                  |              |         |         |

## **Supplemental Method**

### **Participant recruitment**

In 1990, Professor David Mackey (DM) contacted all ophthalmologists in Tasmania and all organisations for the blind in Australia asking to be put in contact with any patient affected by LHON. In addition, DM contacted all clinicians and researchers who had published on LHON pedigrees in Australia. LHON family members were asked to provide their matrilineal family tree as far back as possible, often with assistance of other family members. A professional genealogist then expanded each pedigree using national genealogical resources such as the digitised and microfilmed births deaths and marriage records, published family trees and histories available at genealogical society libraries, as well as legal documents such as wills that name living descendants. Many smaller families were subsequently linked into the main pedigrees <sup>4</sup>.

Subsequently, DM contacted every ophthalmologist in Australia and offered DNA testing for patients suspected to be affected by LHON. This identified some new branches of the main families and provided additional updated pedigree information as well as new mainly small families<sup>3</sup>. Since 1995, LHON patients and families have been referred to our clinics in Melbourne, Tasmania and Western Australia by ophthalmologists across Australia, and new patients have also self-referred to our research team or clinics. In addition to genealogical linkage investigations, we use mtDNA sequencing to identify related pedigrees and conduct more exhaustive genealogical searches to confirm potential linkages. We provide national genetic counselling advice to LHON families.

### **Supplemental References**

1. van Oven, M., and Kayser, M. (2009). Updated comprehensive phylogenetic tree of global human mitochondrial DNA variation. *Hum Mutat* 30, E386-394.
2. Lott, M.T., Leipzig, J.N., Derbeneva, O., Xie, H.M., Chalkia, D., Sarmady, M., Procaccio, V., and Wallace, D.C. (2013). mtDNA Variation and Analysis Using Mitomap and Mitomaster. *Curr Protoc Bioinformatics* 44, 1.23.21-26.
3. Chan, C., Mackey, D.A., and Byrne, E. (1996). Sporadic Leber hereditary optic neuropathy in Australia and New Zealand. *Aust N Z J Ophthalmol* 24, 7-14.
4. Mackey, D.A., and Buttery, R.G. (1992). Leber hereditary optic neuropathy in Australia. *Aust N Z J Ophthalmol* 20, 177-184.
